# Supplementary material for: Constitutive expression of murine c-FLIPR causes autoimmunity in aged mice
Source: PubMed Central journal article supplement — Cell Death Dis. 2014 Apr 10;5(4):e1168–. doi: 10.1038/cddis.2014.138 (PMC5424115; doi:10.1038/cddis.2014.138), 2014-04-10
Supplement: cddis2014138x1.pdf [file cddis2014138x1.pdf]

**Supplementary table 1.** Frequencies of CD11c<sup>+</sup>, F4/80<sup>+</sup>, Gr1<sup>+</sup> (WT n=4, vavFLIP<sub>R</sub> n=6) and CD49b<sup>+</sup> (WT: n=2, vavFLIP<sub>R</sub>: n=4) cells within the CD3<sup>-</sup>CD19<sup>-</sup> compartment in spleen and bone marrow (BM) from one-year-old mice.

| Mouse strain               | Organ         | Frequency within CD3 <sup>-</sup> CD19 <sup>-</sup> subset ( $\pm$ SD) [%] |                    |                    |                  |
|----------------------------|---------------|----------------------------------------------------------------------------|--------------------|--------------------|------------------|
|                            |               | CD11c <sup>+</sup>                                                         | CD49b <sup>+</sup> | F4/80 <sup>+</sup> | Gr1 <sup>+</sup> |
| <b>WT</b>                  | <b>spleen</b> | 3.2 (2.7)                                                                  | 12.9 (2.8)         | 8.5 (7.4)          | 2.7 (1.7)        |
| <b>vavFLIP<sub>R</sub></b> | <b>spleen</b> | 3.8 (3.4)                                                                  | 12.0 (3.9)         | 8.5 (7.3)          | 5.0 (3.1)        |
| <b>WT</b>                  | <b>BM</b>     | 0.8 (0.2)                                                                  | 4.8 (1.6)          | 16.1 (7.5)         | 51.1 (8.5)       |
| <b>vavFLIP<sub>R</sub></b> | <b>BM</b>     | 0.9 (0.5)                                                                  | 6.9 (2.5)          | 19.8 (14.8)        | 55.7 (21.2)      |

(SD = standard deviation)

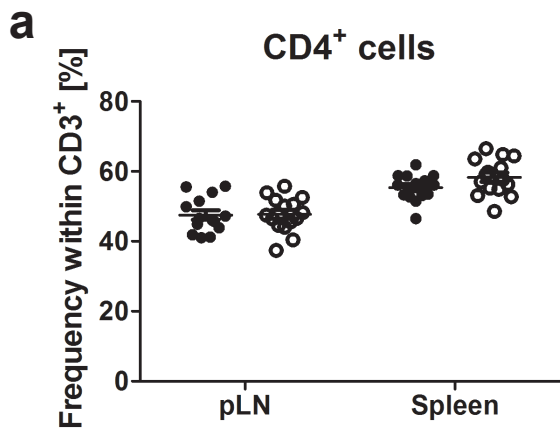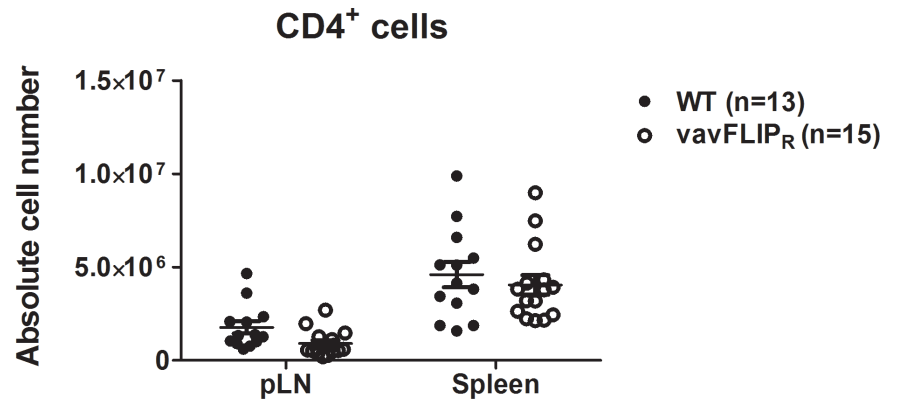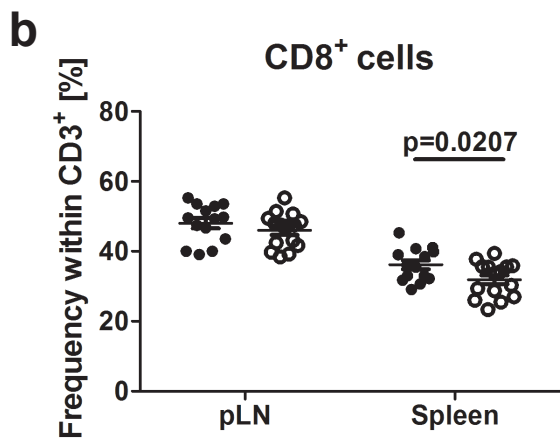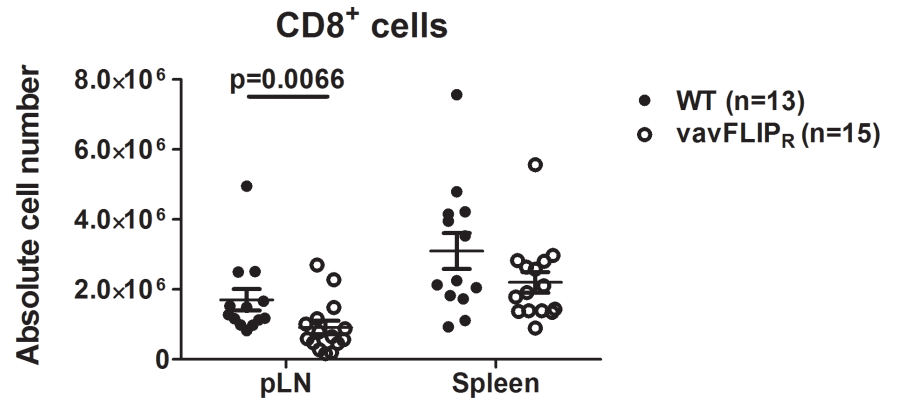

**Supplementary figure 1.** Analysis of lymphocyte populations in 12-14 months old WT and vavFLIP<sub>R</sub> mice. Frequency and absolute cell number of CD4<sup>+</sup> cells (**a**) and CD8<sup>+</sup> cells (**b**) in freshly isolated peripheral lymph nodes (pLN) and spleen from WT (n=13) and vavFLIP<sub>R</sub> (n=15) littermates. Individual mice are represented as separate symbols. Horizontal lines show the mean pooled from five independent experiments; error bars display the SEM. Statistical analyses were performed with two-tailed nonparametric Mann-Whitney *U* tests.

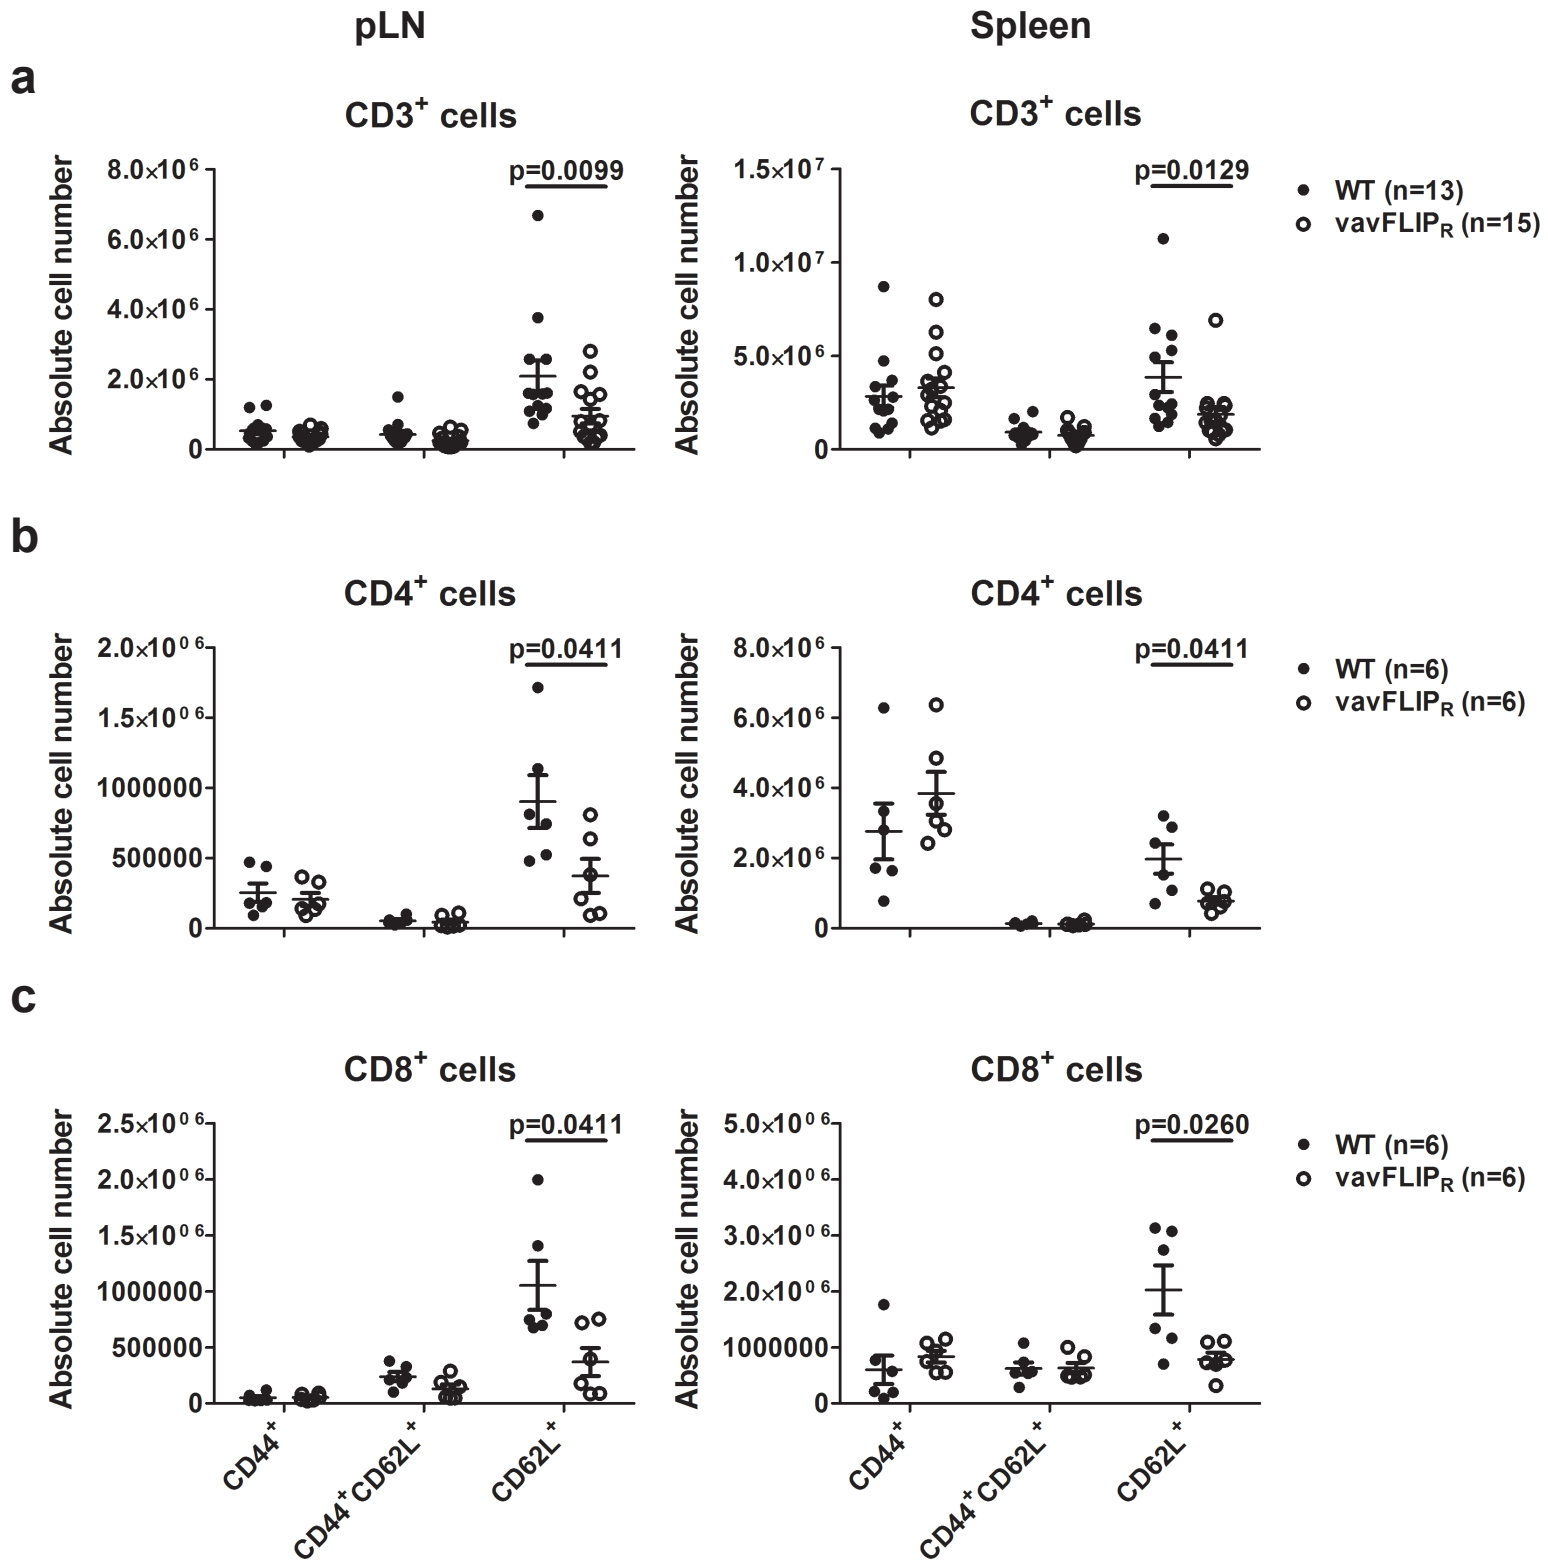

**Supplementary figure 2.** T cell activation status in pLN and spleen from mice at 12-14 months of age. Absolute cell numbers of CD44<sup>+</sup>, CD44<sup>+</sup>CD62L<sup>+</sup> and CD62L<sup>+</sup> cells within CD3<sup>+</sup> cells (**a**), CD4<sup>+</sup> cells (**b**) and CD8<sup>+</sup> cells (**c**) from peripheral lymph nodes (left panel) and spleen (right panel). Symbols represent individual WT (a: n=13, b-c: n=6) and vavFLIP<sub>R</sub> (a: n=15, b-c: n=6) mice. Horizontal lines display (**a**) the mean pooled from five independent experiments ± SEM, (**b-c**) the mean of one experiment representative for two independent experiments ± SEM. Statistical analyses were performed with two-tailed nonparametric Mann-Whitney *U* tests.

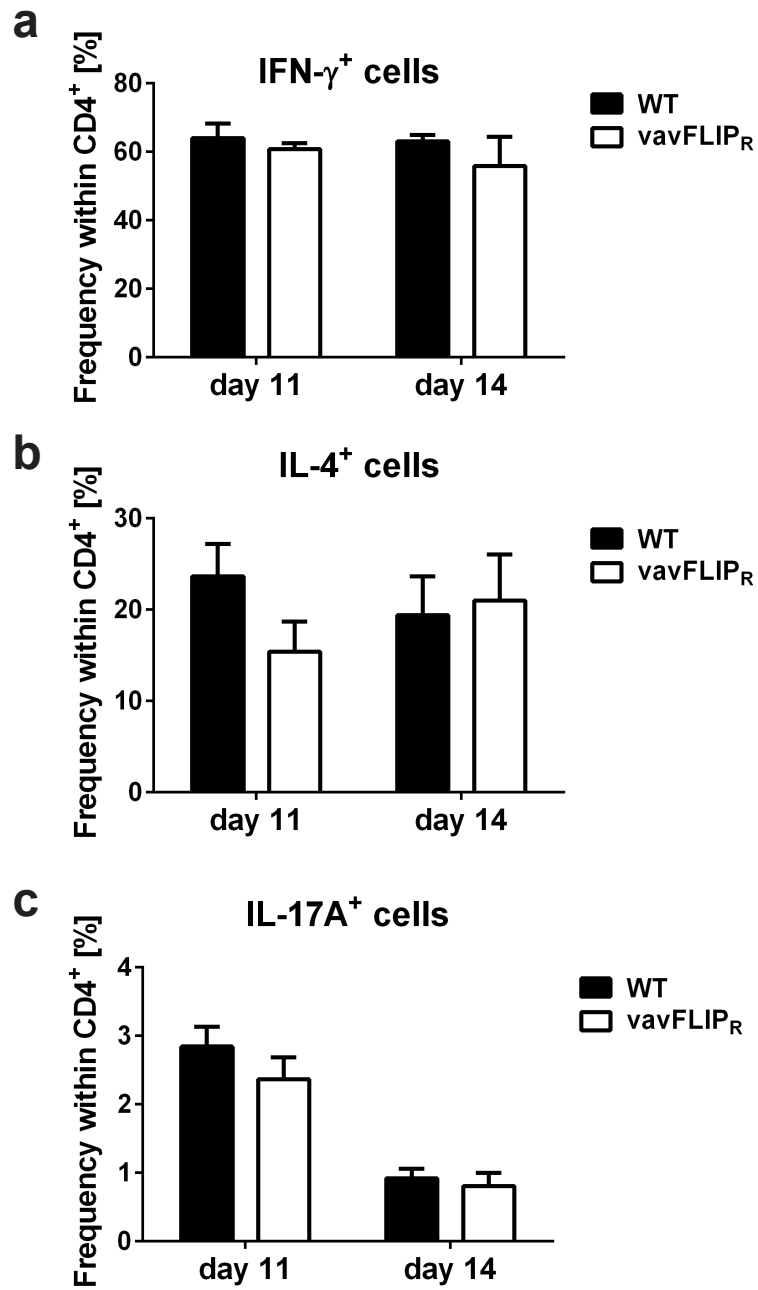

**Supplementary figure 3.** Anti-CD3/anti-CD28 restimulation of peripheral lymph node cells from MOG-immunised WT and vavFLIP<sub>R</sub> mice. WT and vavFLIP<sub>R</sub> animals were injected with the MOG<sub>35-55</sub>-peptide in complete Freund's adjuvant. Peripheral lymph node cells isolated on day 11 (WT n=4, vavFLIP<sub>R</sub> n=4) and day 14 (WT n=5, vavFLIP<sub>R</sub> n=3) after immunisation were restimulated with anti-CD3 and anti-CD28 (both 2 µg/ml) for 24 h, followed by flow cytometry analysis of IFN-γ, IL-17A and IL-4 producing T cells.
